# Supplementary material for: Improved perovskite crystallization by antisolvent engineering in tin-perovskite photovoltaics
Source: Royal Society of Chemistry journal article supplement (doi:10.1039/d4cp02655a), 2024-01-01
Supplement: d4cp02655a1.pdf [file d4cp02655a1.pdf]

<sup>b</sup> Beijing Key Laboratory for Sensor, School of Science, Beijing Information Science and Technology University, Beijing 100101, China

<sup>c</sup> Key Laboratory of the Ministry of Education for Optoelectronic Measurement Technology and Instrument, Beijing Information Science and Technology University, Beijing 100192, China

\* Correspondence: li@bistu.edu.cn;

## Improved Perovskite Crystallization by Antisolvent Engineering in Tin-Perovskite Photovoltaics

Xin Zhang,<sup>ab</sup> Yu Liu,<sup>ab</sup> Xinyao Chen,<sup>a</sup> Chunqian Zhang,<sup>b</sup> Jigang Wang,<sup>c</sup> Jin Cheng<sup>b</sup> and Junming Li<sup>\*b</sup>

<sup>a</sup> Key Laboratory of Modern Measurement & Control Technology, Ministry of Education, Beijing Information Science and Technology University, Beijing 100192, China

<sup>b</sup> Beijing Key Laboratory for Sensor, School of Science, Beijing Information Science and Technology University, Beijing 100101, China

<sup>c</sup> Key Laboratory of the Ministry of Education for Optoelectronic Measurement Technology and Instrument, Beijing Information Science and Technology University, Beijing 100192, China

\* Correspondence: li@bistu.edu.cn;

**Table S1.** Statistics of photovoltaic performance parameters of tin-based perovskite solar cells.

| Year | $V_{oc}$ (V) | $J_{sc}$ (mA/cm <sup>2</sup> ) | FF (%) | PCE (%) | Ref |
|------|--------------|--------------------------------|--------|---------|-----|
| 2014 | 0.88         | 16.8                           | 42     | 6.4     | 1   |
| 2014 | 0.82         | 12.3                           | 57     | 5.7     | 2   |
| 2016 | 0.47         | 22.07                          | 60.67  | 6.22    | 3   |
| 2017 | 0.61         | 21.2                           | 62.7   | 8.12    | 4   |
| 2017 | 0.53         | 24.1                           | 71     | 9       | 5   |
| 2018 | 0.62         | 21.2                           | 72.9   | 9.6     | 6   |
| 2020 | 0.84         | 20.32                          | 78     | 13.24   | 7   |
| 2021 | 0.84         | 24.91                          | 70.76  | 14.81   | 8   |
| 2022 | 0.77         | 24.9                           | 76.7   | 14.7    | 9   |
| 2022 | 0.92         | 20.4                           | 76.7   | 14.3    | 10  |
| 2023 | 0.91         | 20.6                           | 78.6   | 14.6    | 11  |
| 2024 | 0.86         | 24.81                          | 72.37  | 15.4    | 12  |
| 2024 | 0.97         | 21.7                           | 74.1   | 15.7    | 13  |

**Table S2.** Fundamental physical parameters of DMF, DMSO, CB, DMS.

| Solvents | Donor number<br>(kcal/mol) | Dielectric<br>constant | Dipole moment<br>(D) | Boiling point<br>( °C) | Vapor pressure<br>at 20 °C (kPa) |
|----------|----------------------------|------------------------|----------------------|------------------------|----------------------------------|
| DMF      | 26.6                       | 36.7                   | 3.7                  | 153                    | 0.38                             |
| DMSO     | 29.8                       | 46.6                   | 4.1                  | 189                    | 0.05                             |
| CB       | 3.3                        | 5.6                    | 1.5                  | 132                    | 1.17                             |
| DMS      | 40.0                       | 6.3                    | 1.5                  | 38                     | 53.7                             |

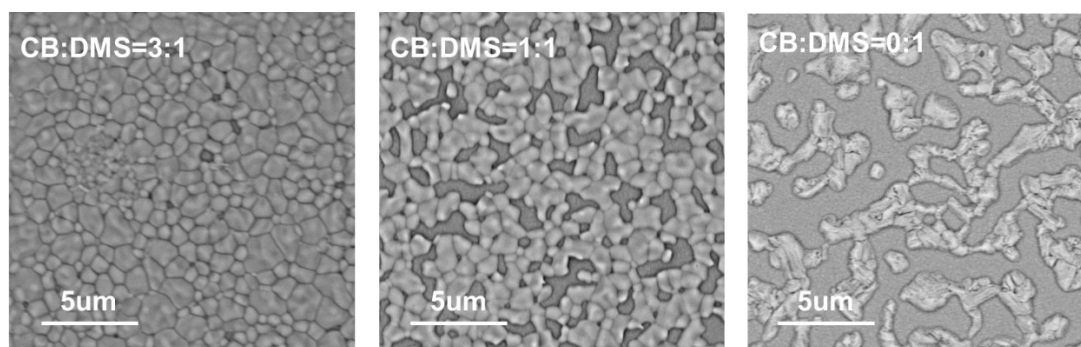

**Fig. S1** Top-view scanning electron microscopy images of different ratios of CB and DMS.

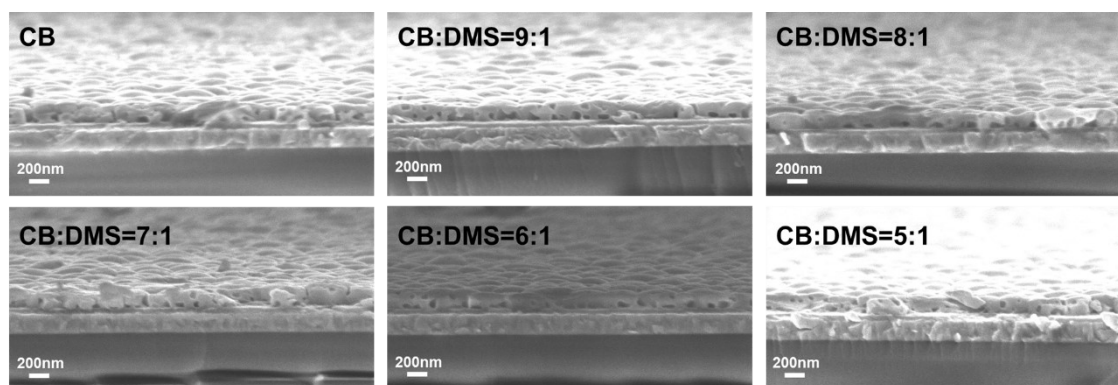

**Fig. S2** Cross-sectional SEM images of tin-based perovskite films based on different antisolvent ratios.

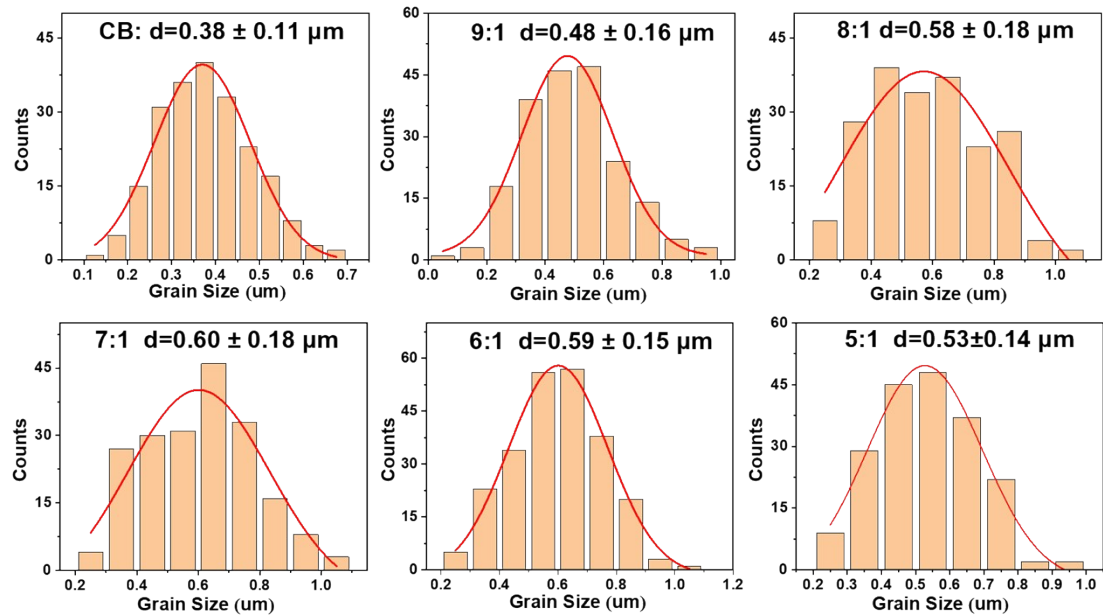

Fig. S3 Grain diameter distribution of tin-based perovskite films with different antisolvent ratios.

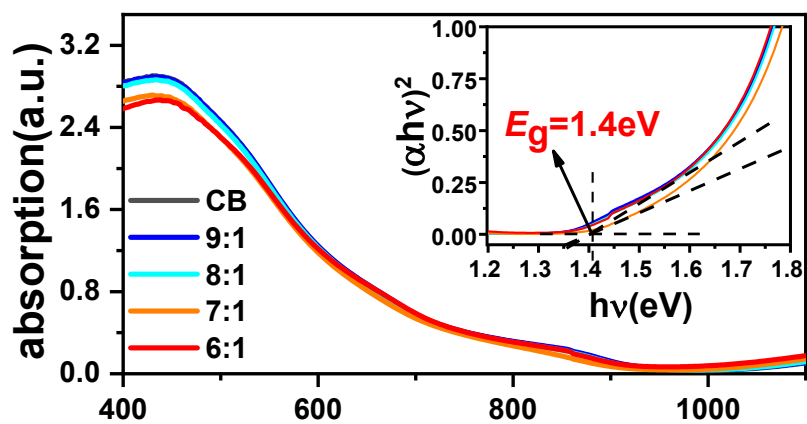

Fig. S4 UV-vis absorption spectrum of perovskite films with different proportions of antisolvent. Inset shows the Tauc plot.

**Table S3.** Percentage of XPS peak area of Sn<sup>4+</sup> and Sn<sup>2+</sup> for tin-based PSCs with different antisolvent ratios.

| CB:DMS | Sn 3d5/2         |                  | Sn 3d3/2         |                  |
|--------|------------------|------------------|------------------|------------------|
|        | Sn <sup>2+</sup> | Sn <sup>4+</sup> | Sn <sup>2+</sup> | Sn <sup>4+</sup> |
| CB     | 31.90 %          | 17.94 %          | 32.11 %          | 18.05 %          |
| 9:1    | 33.02 %          | 16.82 %          | 33.23 %          | 16.93 %          |
| 8:1    | 34.47 %          | 15.37 %          | 34.69 %          | 15.47 %          |
| 7:1    | 35.43 %          | 14.41 %          | 35.65 %          | 14.51 %          |
| 6:1    | 37.00 %          | 12.84 %          | 37.24 %          | 12.92 %          |
| 5:1    | 33.60 %          | 16.32 %          | 33.80 %          | 16.27 %          |

**Table S4.** Photovoltaic performance parameters of tin-based perovskite solar cells with different antisolvent ratios.

| CB: DMS | V <sub>oc</sub><br>(V) | J <sub>sc</sub><br>(mA/cm <sup>2</sup> ) | FF<br>(%) | PCE<br>(%) |
|---------|------------------------|------------------------------------------|-----------|------------|
| 1:0     | 0.39                   | 18.3                                     | 58.30     | 4.2        |
| 9:1     | 0.42                   | 18.0                                     | 59.28     | 4.5        |
| 8:1     | 0.41                   | 20.1                                     | 55.79     | 4.2        |
| 7:1     | 0.44                   | 18.0                                     | 61.79     | 4.9        |
| 6:1     | 0.44                   | 19.8                                     | 64.19     | 5.3        |
| 5:1     | 0.45                   | 14.7                                     | 63.92     | 4.3        |

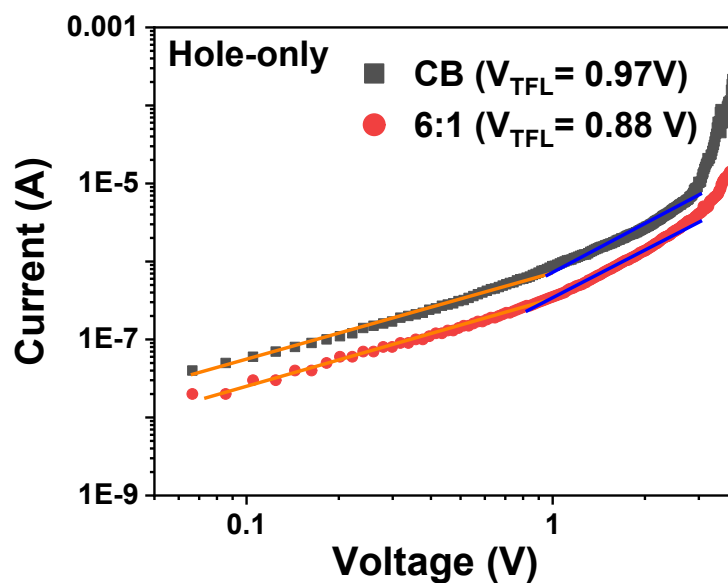

Fig. S5 SCLC curve of hole-only devices prepared with CB and CB:DMS=6:1 as anti-solvent.

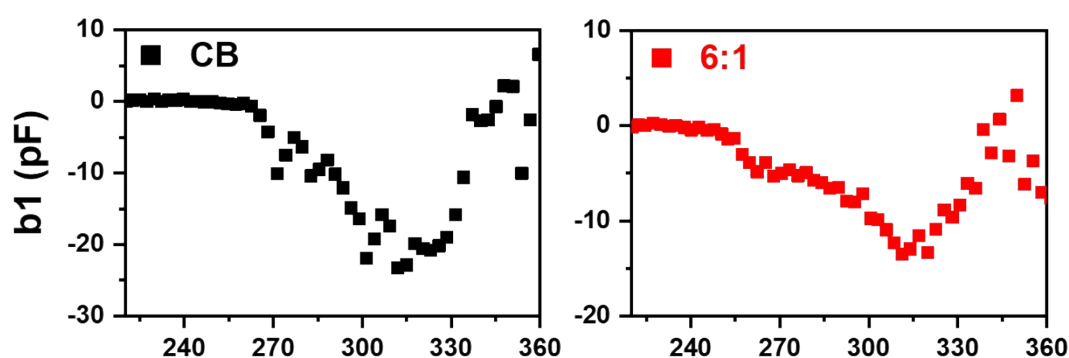

Fig. S6 Deep-level transient spectroscopy (DLTS) signal from CB device (black) and CB:DMS=6:1 device (red).

## References :

- Noel, N. K.; Stranks, S. D.; Abate, A.; Wehrenfennig, C.; Guarnera, S.; Haghighirad, A.-A.; Sadhanala, A.; Eperon, G. E.; Pathak, S. K.; Johnston, M. B.; Petrozza, A.; Herz, L. M.; Snaith, H. J., Lead-free organic-inorganic tin halide perovskites for photovoltaic applications. *Energy Environ. Sci.* **2014**, 7 (9), 3061-3068.
- Hao, F.; Stoumpos, C. C.; Cao, D. H.; Chang, R. P. H.; Kanatzidis, M. G., Lead-free solid-state organic-inorganic halide perovskite solar cells. *Nature Photonics* **2014**, 8 (6), 489-494.
- Liao, W.; Zhao, D.; Yu, Y.; Grice, C. R.; Wang, C.; Cimaroli, A. J.; Schulz, P.; Meng, W.; Zhu, K.; Xiong, R. G.; Yan, Y., Lead-Free Inverted Planar Formamidinium Tin Triiodide Perovskite Solar Cells Achieving Power Conversion Efficiencies up to 6.22. *Adv Mater* **2016**, 28 (42), 9333-9340.
- Zhao, Z.; Gu, F.; Li, Y.; Sun, W.; Ye, S.; Rao, H.; Liu, Z.; Bian, Z.; Huang, C., Mixed-Organic-Cation Tin Iodide for Lead-Free Perovskite Solar Cells with an Efficiency of 8.12. *Adv Sci (Weinh)* **2017**, 4 (11), 1700204.
- Shao, S.; Liu, J.; Portale, G.; Fang, H. H.; Blake, G. R.; ten Brink, G. H.; Koster, L. J. A.; Loi,

- M. A., Highly Reproducible Sn-Based Hybrid Perovskite Solar Cells with 9% Efficiency. *Advanced Energy Materials* **2017**, *8* (4).
6. Jokar, E.; Chien, C. H.; Tsai, C. M.; Fathi, A.; Diau, E. W., Robust Tin-Based Perovskite Solar Cells with Hybrid Organic Cations to Attain Efficiency Approaching 10. *Adv Mater* **2019**, *31* (2), e1804835.
  7. Nishimura, K.; Kamarudin, M. A.; Hirotsu, D.; Hamada, K.; Shen, Q.; Iikubo, S.; Minemoto, T.; Yoshino, K.; Hayase, S., Lead-free tin-halide perovskite solar cells with 13% efficiency. *Nano Energy* **2020**, *74*.
  8. Yu, B. B.; Chen, Z.; Zhu, Y.; Wang, Y.; Han, B.; Chen, G.; Zhang, X.; Du, Z.; He, Z., Heterogeneous 2D/3D Tin-Halides Perovskite Solar Cells with Certified Conversion Efficiency Breaking 14. *Adv Mater* **2021**, *33* (36), e2102055.
  9. Zhou, J.; Hao, M.; Zhang, Y.; Ma, X.; Dong, J.; Lu, F.; Wang, J.; Wang, N.; Zhou, Y., Chemo-thermal surface dedoping for high-performance tin perovskite solar cells. *Matter* **2022**, *5* (2), 683-693.
  10. Zhu, Z.; Jiang, X.; Yu, D.; Yu, N.; Ning, Z.; Mi, Q., Smooth and Compact FASnI<sub>3</sub> Films for Lead-Free Perovskite Solar Cells with over 14% Efficiency. *ACS Energy Letters* **2022**, *7* (6), 2079-2083.
  11. Li, H.; Zang, Z.; Wei, Q.; Jiang, X.; Ma, M.; Xing, Z.; Wang, J.; Yu, D.; Wang, F.; Zhou, W.; Wong, K. S.; Chow, P. C. Y.; Zhou, Y.; Ning, Z., High-member low-dimensional Sn-based perovskite solar cells. *Science China Chemistry* **2023**, *66* (2), 459-465.
  12. Chen, J.; Luo, J.; Hou, E.; Song, P.; Li, Y.; Sun, C.; Feng, W.; Cheng, S.; Zhang, H.; Xie, L.; Tian, C.; Wei, Z., Efficient tin-based perovskite solar cells with trans-isomeric fulleropyrrolidine additives. *Nature Photonics* **2024**, *18* (5), 464-470.
  13. Shi, Y.; Zhu, Z.; Miao, D.; Ding, Y.; Mi, Q., Interfacial Dipoles Boost Open-Circuit Voltage of Tin Halide Perovskite Solar Cells. *ACS Energy Letters* **2024**, *9* (4), 1895-1897.
